# Supplementary material for: An Exploratory Study Provides Insights into MMP9 and Aβ Levels in the Vitreous and Blood across Different Ages and in a Subset of AMD Patients
Source: MDPI journal article supplement (doi:10.3390/ijms232314603), 2022-11-23
Supplement: s1 [file s1]

Supplementary Table S1

| Control subjects |     |        |                 |                    |                        |                          |                         |                    |                               |                     |                  |                      |                   |
|------------------|-----|--------|-----------------|--------------------|------------------------|--------------------------|-------------------------|--------------------|-------------------------------|---------------------|------------------|----------------------|-------------------|
| Number           | Age | Gender | Smoking status  | Smoking pack years | Mean arterial pressure | Primary cause of surgery | Previous ocular history | Medical history    | Medication                    | Aβ vitreous (pg/ml) | Aβ blood (pg/ml) | MMP vitreous (pg/ml) | MMP blood (pg/ml) |
| 1                | 74  | F      | Never smoked    | 0                  | 103.67                 | ERM, CAT                 |                         | HYP                | CV                            | 1085.46             |                  | 400.82               | 1563              |
| 2                | 72  | F      | Never smoked    | 0                  | 98                     | ERM                      |                         |                    | CV, AP                        | 581.47              |                  | 399.91               | 1506.25           |
| 3                | 80  | M      | Never smoked    | 0                  | 90.33                  | ERM                      |                         | CRD, ART, HYP      | CV, AP                        | 960.47              | 265.6            | 262.62               | 1200.13           |
| 4                | 64  | F      | Ex heavy smoker | 18.75              | 88                     | VMT                      |                         |                    | MET                           | 1830.34             | 44.18            | 289.55               | 958.49            |
| 5                | 58  | F      | Ex heavy smoker | 7.5                | 91.67                  | ERM                      |                         |                    |                               | 464.3               | 19.32            | 1752.75              | 1217.83           |
| 6                | 76  | F      | Ex light smoker | 0.5                | 91.67                  | ERM                      |                         | ART, DBT           | CV, MET, AP, COAG, MUSC       | 1346.19             | 574.43           | 630.58               | 1290.88           |
| 7                | 71  | F      | Never smoked    | 0                  |                        | VF                       | CAT, GLA                |                    | CV, MET, AP                   |                     | 320.72           |                      | 1947.3            |
| 8                | 60  | F      | Never smoked    | 0                  |                        | VF                       | ERM, CAT, VMT           |                    | MET, NRV, HRMNS               | 1144.07             | 170.79           | 437.3                | 1780.69           |
| 9                | 64  | F      | Ex heavy smoker | 18                 | 79.33                  | ERM                      |                         | ART, DEP           | CV, MET, NRV                  | 971.46              | 167.91           | 214.07               | 1899.5            |
| 10               | 72  | M      | Heavy smoker    | 15                 |                        | ERM                      |                         | ART                |                               | 2342.9              | 833.67           | 191.77               | 1594.28           |
| 11               | 74  | F      | Never smoked    | 0                  |                        | ERM                      |                         | HYP                | CV                            | 619.02              | 178.77           | 263.11               | 899.65            |
| 12               | 78  | F      | Never smoked    | 0                  | 85.67                  | CAT, VMT                 |                         | CRC, ART, HYP      | CV, MET, AP, COAG             | 897.07              | 410.27           | 295.58               | 487.81            |
| 13               | 79  | M      | Never smoked    | 0                  | 83.33                  |                          |                         | ART                | CV, MET, NRV, AP, COAG, GUSSH | 2640.17             | 1226.49          | 703.04               | 1214.88           |
| 14               | 63  | F      | Ex heavy smoker | 7.5                | 75.33                  | ERM                      |                         | ART                | NRV                           | 1698.33             | 306.35           | 184.59               | 1758.51           |
| 15               | 74  | F      | Never smoked    | 0                  | 93.67                  | MH                       | CAT                     | CRC                |                               | 927.85              |                  | 123.4                |                   |
| 16               | 72  | M      | Heavy smoker    | 10                 | 74                     | ERM                      |                         |                    |                               | 1256.12             |                  | 328.05               |                   |
| 17               | 76  | F      | Never smoked    | 0                  | 84.67                  | ERM                      | CAT                     | ART                | MUSC                          | 476.92              | 316.96           | 192.8                | 1556.78           |
| 18               | 78  | M      | Heavy smoker    | 15                 | 100                    | MH                       |                         | CRD, HYP           | CV, MET, AP, GUSSH            | 1417.93             |                  | 697.05               |                   |
| 19               | 79  | F      | Ex heavy smoker | 20                 | 118                    | VMT                      |                         |                    | CV, MET, NRV, COAG            | 2048.9              |                  | 2208.59              |                   |
| 20               | 77  | F      | Never smoked    | 0                  | 104                    | ERM                      |                         |                    | CV, MET, NRV, AP              | 1319.06             | 290.92           | 4844.79              | 3076.08           |
| 21               | 63  | F      | Never smoked    | 0                  | 125                    | ERM                      |                         | ANX                | CV                            | 734.29              | 519.8            | 400.58               | 1732.14           |
| 22               | 76  | M      | Ex light smoker | 1                  | 99.33                  | ERM                      |                         |                    | CV                            | 600.28              | 218.62           | 1854.78              | 1428.04           |
| 23               | 66  | F      | Light smoker    | 1.6                | 98                     | MH                       |                         |                    | MET                           | 2833.81             | 1625.68          | 0.45                 | 2354.17           |
| 24               | 82  | F      | Light smoker    | 6                  | 102.67                 | ERM                      |                         | CRC                | CV                            | 21.63               | 3102.18          |                      | 1230.07           |
| 25               | 75  | F      | Ex light smoker | 6                  | 102                    | ERM                      |                         | ART                | MET, AP, COAG, IMU            | 3030.97             |                  | 600.44               |                   |
| 26               | 77  | F      | Not declared    | 0                  | 105.67                 | ERM                      |                         | ANX                | NRV                           | 2808.91             | 453.07           | 567.39               | 2089.63           |
| 27               | 78  | F      | Ex heavy smoker | 22.5               | 104                    | MH                       |                         | ART, HYP           | CV, AP, COAG, HRMNS           | 239.25              | 368.82           |                      | 2301.25           |
| 28               | 65  | F      | Ex light smoker | 0                  |                        | MH                       |                         | ANX                |                               | 971.28              | 1774.54          |                      | 1971.97           |
| 29               | 70  | F      | Heavy smoker    | 27.5               | 91                     | ERM                      |                         | ART, ANX           | MET, NRV                      | 257.06              | 296.69           |                      | 2370.07           |
| 30               | 58  | F      | Heavy smoker    | 11.4               | 100                    | MH                       |                         |                    |                               | 80                  | 798.45           |                      | 4003.27           |
| 31               | 78  | M      | Never smoked    | 0                  | 106                    | ERM                      | CAT                     |                    | CV                            | 12                  | 136.77           |                      | 2576.01           |
| 32               | 72  | F      | Never smoked    | 0                  | 97.33                  |                          | MH                      | HEP, ART, HYP, ANX | NRV, AP                       | 814.01              | 249.61           | 827.63               | 4033.01           |
| 33               | 53  | M      | Never smoked    | 0                  | 78                     | VF                       |                         |                    |                               | 109.37              | 1375.2           | 122.89               | 4794.21           |
| 34               | 72  | M      | Never smoked    | 0                  | 92                     | ERM, CAT, MH             |                         | HYP                | CV, COAG                      | 586.5               | 1780.81          |                      | 2642.98           |
| 35               | 76  | F      | Never smoked    | 0                  | 93.67                  |                          | CAT                     | CRC, ASM           | AP, RSP                       | 2103.18             | 149.97           | 895.91               | 1842.25           |
| 36               | 67  | F      | Never smoked    | 0                  |                        | ERM                      |                         | ART, ASM           | AP, RSP                       | 1583.69             | 148.53           | 97.72                | 1466.49           |
| 37               | 82  | F      | Ex light smoker | 2.5                |                        | ERM, CAT                 |                         | CRD, HYP           | CV, COAG, GUSSH               | 41.69               | 273.02           |                      | 1652.63           |
| 38               | 71  | F      | Ex heavy smoker | 75                 | 78.33                  | MH                       |                         |                    | CV, MET, NRV, COAG            | 1917.43             | 343.66           |                      | 4430.5            |
| 39               | 70  | M      | Ex light smoker | 0.75               | 109.67                 | MH                       |                         |                    | CV                            | 48.65               | 267.28           |                      | 620.92            |
| 40               | 82  | M      | Ex light smoker | 2.75               | 90                     | ERM                      | CAT                     | ART                | NRV, COAG, GUSSH, IMU         | 1603.18             | 180.54           | 160.54               | 1331.35           |
| 41               | 66  | F      | Never smoked    | 0                  | 95.67                  | MH                       | CAT                     |                    |                               | 918.29              | 357.58           | 2330.96              | 3329.66           |
